# Supplementary material
Source: PubMed Central journal article supplement (PMC8013333)

**A**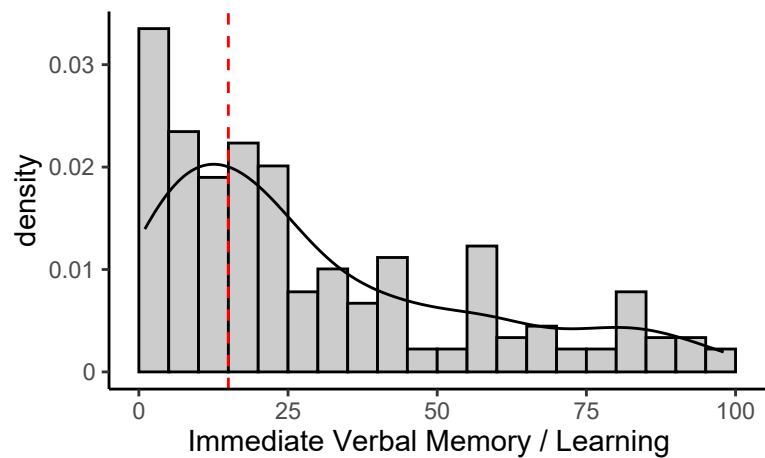**B**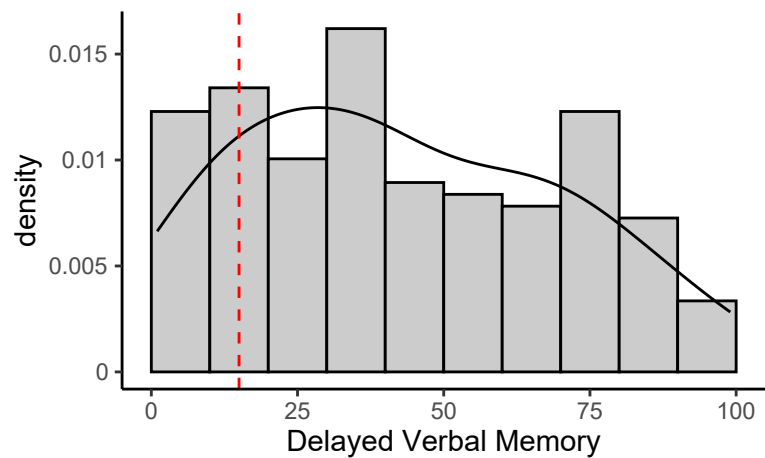**C**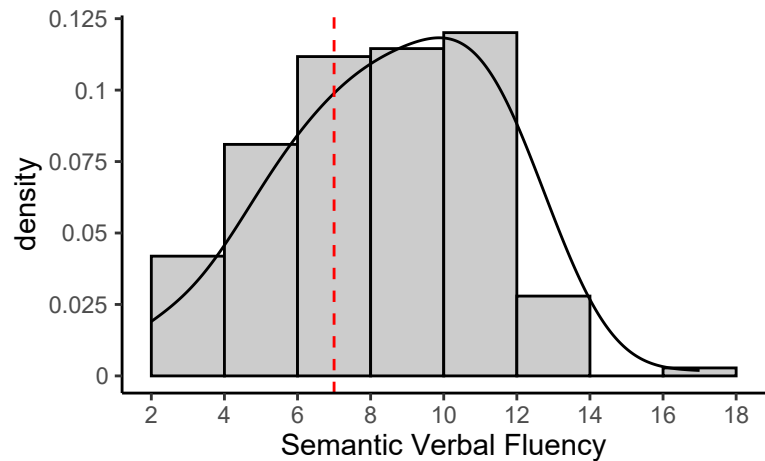**D**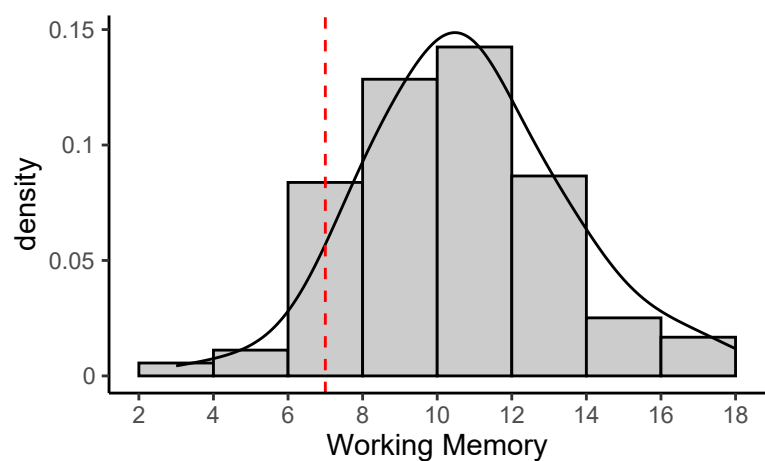

Supplement: JOIM-290-621-s001.pdf [file JOIM-290-621-s001.pdf]

**A**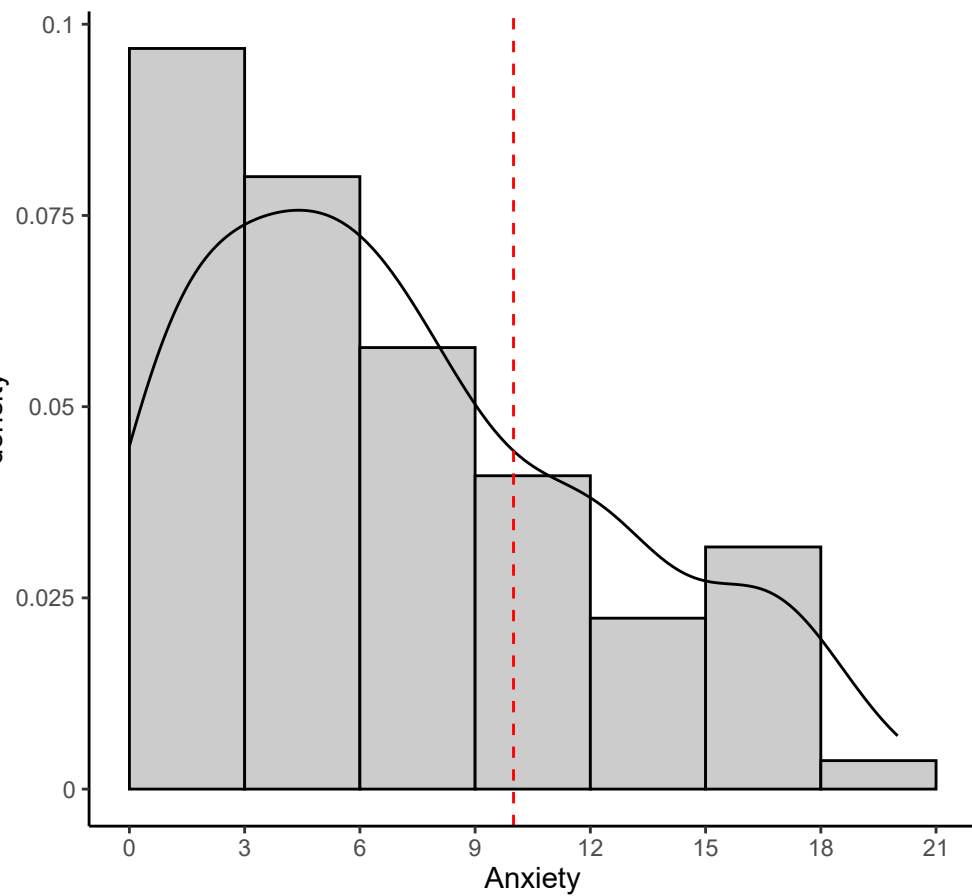**B**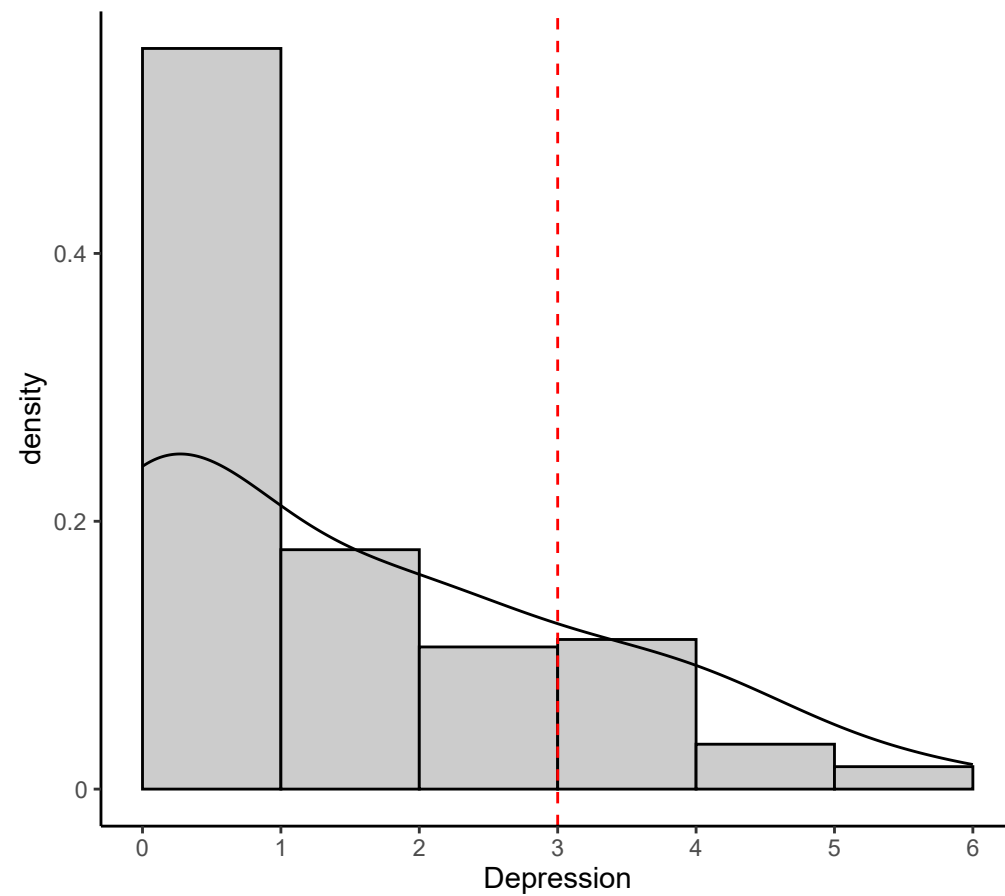**C**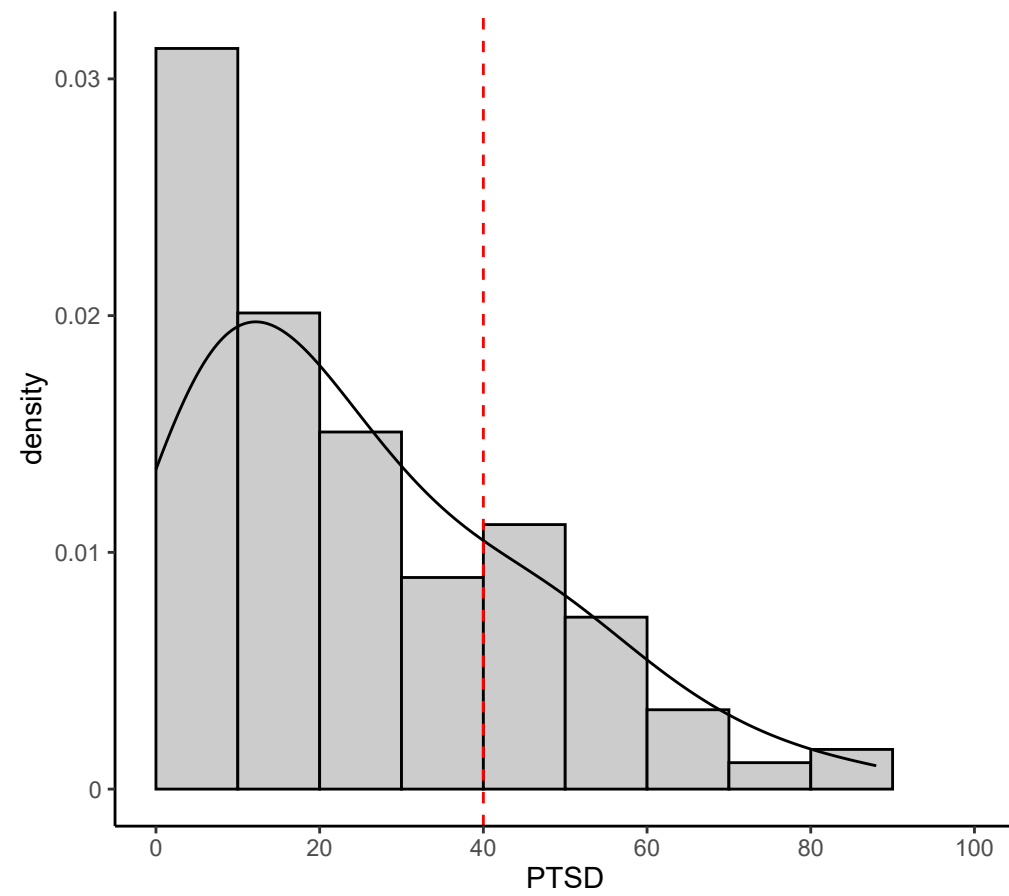

Supplement: JOIM-290-621-s002.pdf [file JOIM-290-621-s002.pdf]
